# Supplementary material for: Experimental and theoretical investigation of cyclometallated platinum(ii) complex containing adamantanemethylcyanamide and 1,4-naphthoquinone derivative as ligands: synthesis, characterization, interacting with guanine and cytotoxic activity
Source: Royal Society of Chemistry journal article supplement (doi:10.1039/c8ra08739c), 2019-01-01
Supplement: c8ra08739c1.pdf [file c8ra08739c1.pdf]

## Supplementary Information

**Experimental and theoretical investigation of cyclometallated platinum(II) complex containing adamantanemethylcyanamide and 1,4-naphthoquinone derivative as ligands: synthesis, characterization, interacting with guanine and cytotoxic activity**

Leila Tabrizi<sup>1\*</sup>, Bachir Zouchoune<sup>2,3\*</sup>, Abdallah Zaiter<sup>3</sup>

<sup>1</sup> School of Chemistry, National University of Ireland Galway, University Road, Galway, Ireland, H91 TK33

<sup>2</sup> Laboratoire de Chimie appliquée et Technologie des Matériaux, Université Larbi Ben M'Hidi - Oum El Bouaghi, (04000) Oum El Bouaghi, Algeria.

<sup>3</sup> Unité de Recherche de Chimie de l'Environnement et Moléculaire Structurale, Université Constantine (Mentouri), (25000) Constantine, Algeria.

Corresponding author: Leila Tabrizi; Email: [LEILA.TABRIZI@nuigalway.ie](mailto:LEILA.TABRIZI@nuigalway.ie)

Corresponding author: Bachir Zouchoune; Email: [bzouchoune@gmail.com](mailto:bzouchoune@gmail.com)

## LIST OF SUPPORTING INFORMATION

**Figure S1.** TOF MS spectrum of ligand 1-Adamantanemethylcyanamide (1-ADpcydH).

**Figure S2.** TOF MS spectrum of ligand 2-[amino(2-phenylpyridine)]-1,4-naphthoquinone (1,4-NQ).

**Figure S3.** TOF MS spectrum of complex **1**, cis-Pt(1,4-NQ)(1-ADpcyd)(H<sub>2</sub>O).

**Figure S4.** <sup>1</sup>H NMR spectrum of ligand 1-Adamantanemethylcyanamide (1-ADpcydH) (DMSO-*d*<sub>6</sub>).

**Figure S5.** <sup>1</sup>H NMR spectrum of ligand 2-[amino(2-phenylpyridine)]-1,4-naphthoquinone (1,4-NQ) (DMSO-*d*<sub>6</sub>).

**Figure S6.** <sup>1</sup>H NMR spectrum of complex **1**, cis-Pt(1,4-NQ)(1-ADpcyd)(H<sub>2</sub>O) (DMSO-*d*<sub>6</sub>).

**Figure S7.** <sup>13</sup>C NMR spectrum of ligand 1-Adamantanemethylcyanamide (1-ADpcydH) (DMSO-*d*<sub>6</sub>).

**Figure S8.** <sup>13</sup>C NMR spectrum of ligand 2-[amino(2-phenylpyridine)]-1,4-naphthoquinone (1,4-NQ) (DMSO-*d*<sub>6</sub>).

**Figure S9.** <sup>13</sup>C NMR spectrum of complex **1**, cis-Pt(1,4-NQ)(1-ADpcyd)(H<sub>2</sub>O) (DMSO-*d*<sub>6</sub>).

**Figure S10.** <sup>195</sup>Pt NMR spectrum of complex **1**, cis-Pt(1,4-NQ)(1-ADpcyd)(H<sub>2</sub>O) (DMF-*d*<sub>7</sub>).

**Figure S11.** <sup>1</sup>H NMR spectrum of complex **2**, cis-Pt(1,4-NQ)(1-ADpcyd)(G) (DMSO-*d*<sub>6</sub>).

**Figure S12.** <sup>13</sup>C NMR spectrum of complex **2**, cis-Pt(1,4-NQ)(1-ADpcyd)(G) (DMSO-*d*<sub>6</sub>).

**Figure S13.** <sup>195</sup>Pt NMR spectrum of complex **2**, cis-Pt(1,4-NQ)(1-ADpcyd)(G) (DMF-*d*<sub>7</sub>).

**Figure S14.** HPLC of the complex **1** in freshly prepared PBS buffer/0.5% DMSO solution recorded during 72 h of incubation time at 37 °C.

**Figure S15.** Graphs used for IC<sub>50</sub> value determinations. Dose-response data points represent the mean value of 3 trials. GraphPad Prism 6 software was used to fit the data.

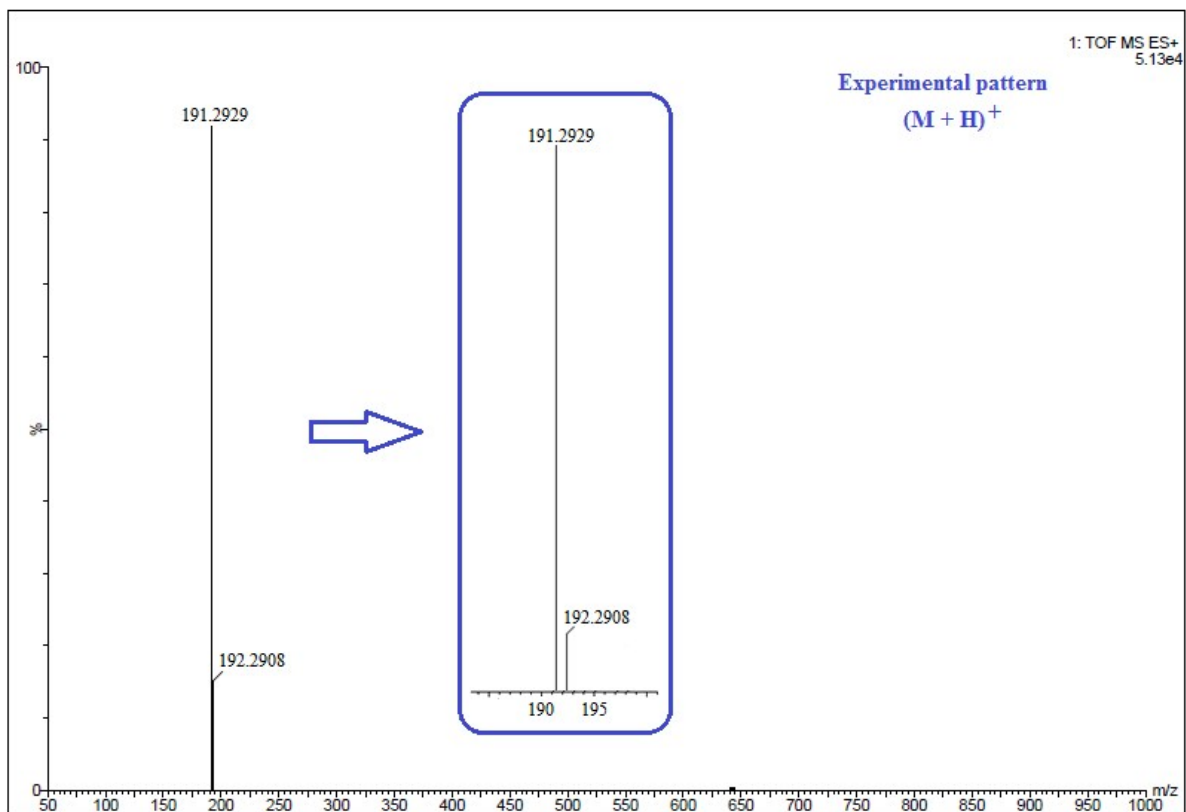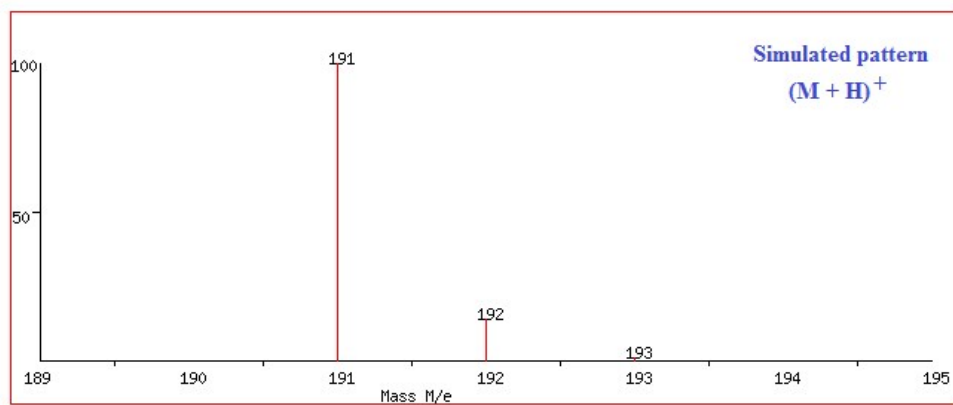

**Figure S1.** TOF MS spectrum of ligand 1-Adamantanemethylcyanamide (1-ADpcydh).

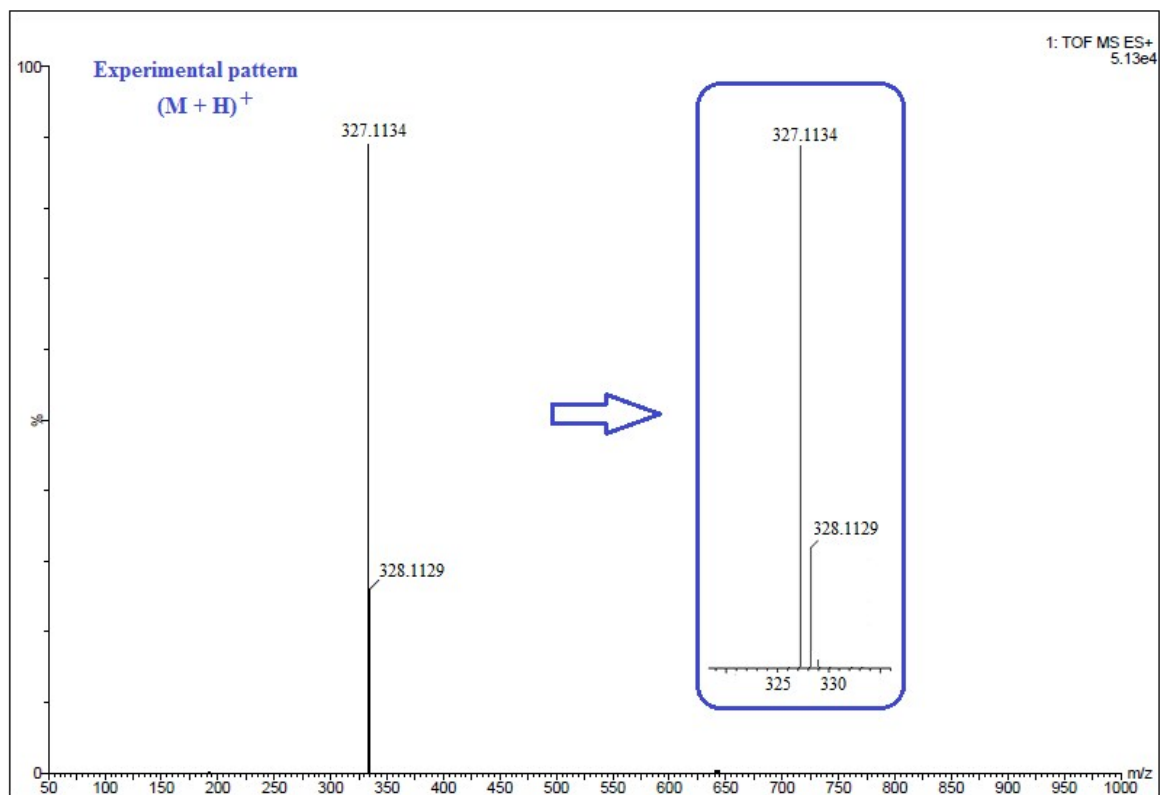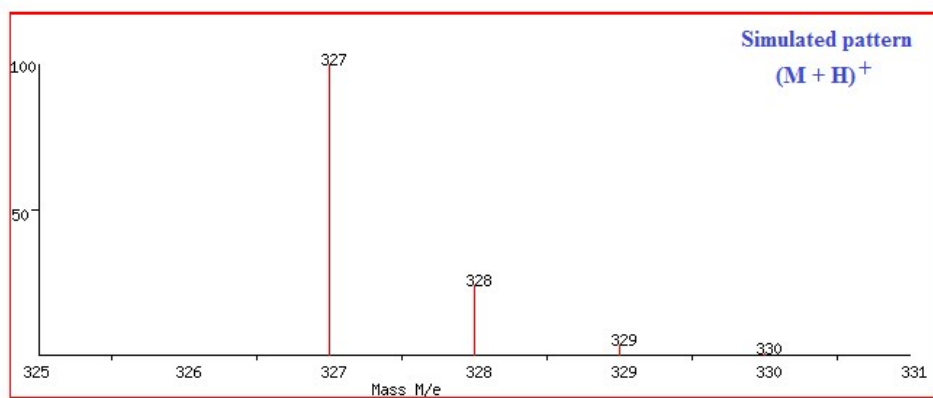

**Figure S2.** TOF MS spectrum of ligand 2-[amino(2-phenylpyridine)]-1,4-naphthoquinone (1,4-NQ).

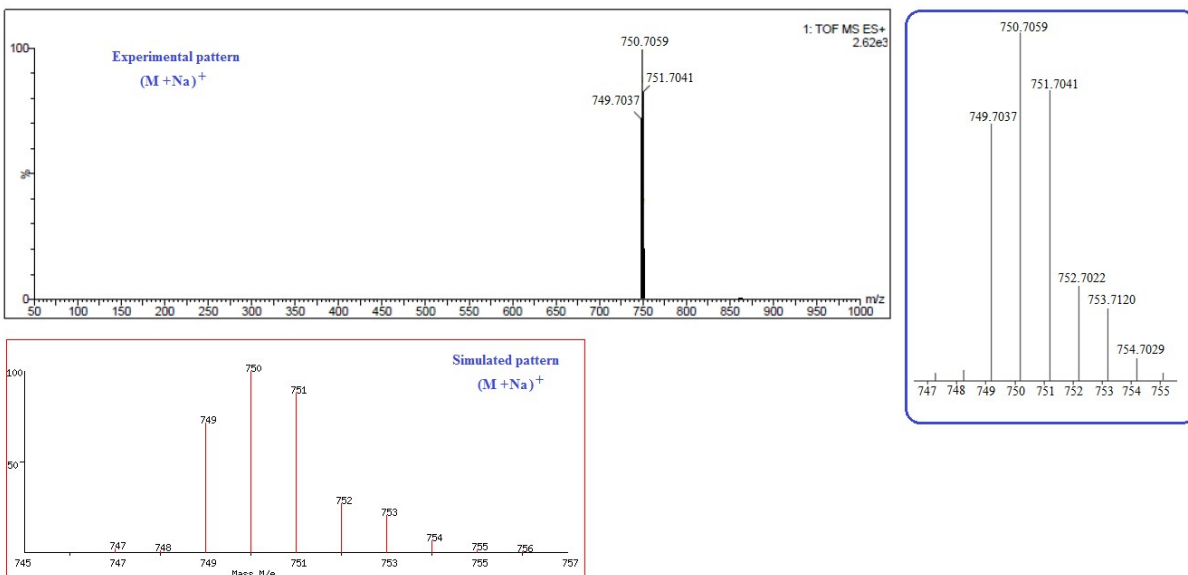

**Figure S3.** TOF MS spectrum of complex **1**, cis-Pt(1,4-NQ)(1-ADpcyd)(H<sub>2</sub>O).

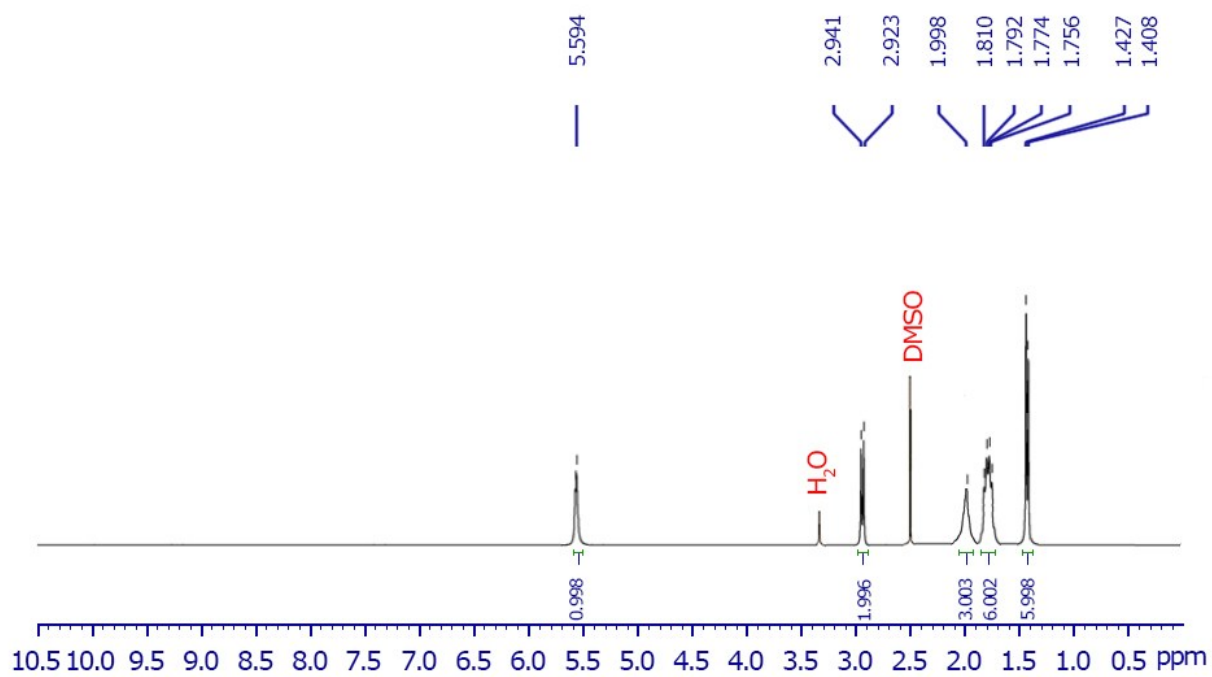

**Figure S4.** <sup>1</sup>H NMR spectrum of ligand 1-Adamantanemethylcyanamide (1-ADpcydh) (DMSO-*d*<sub>6</sub>).

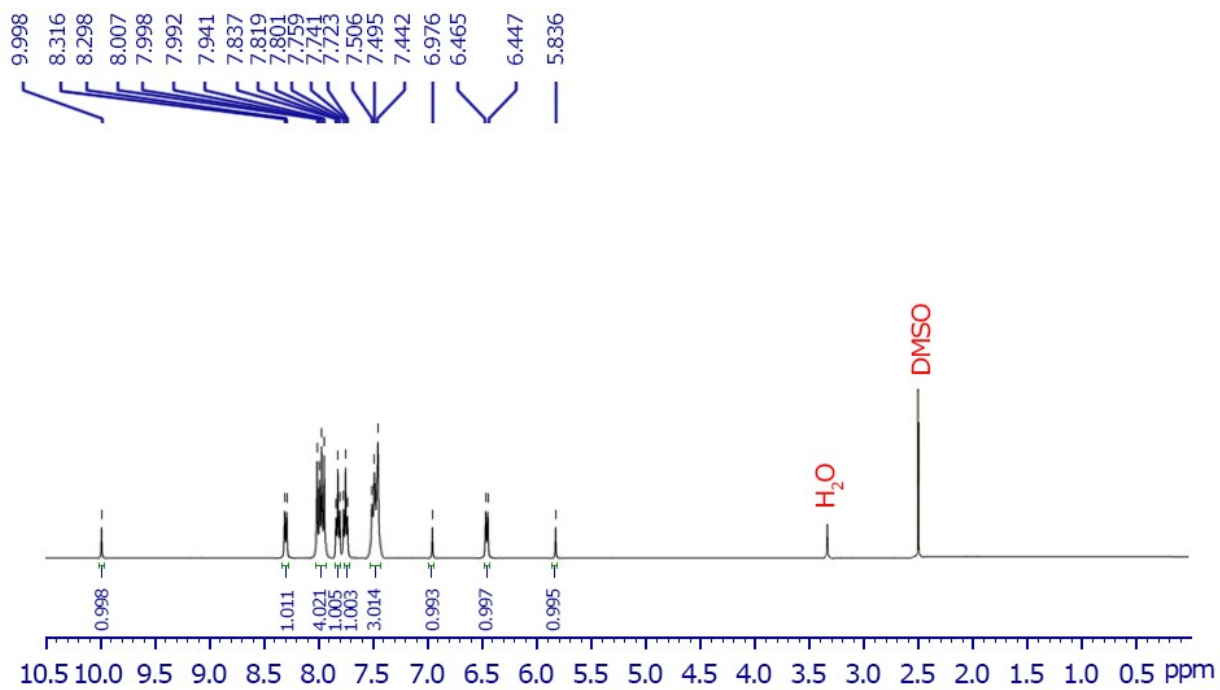

**Figure S5.** <sup>1</sup>H NMR spectrum of ligand 2-[amino(2-phenylpyridine)]-1,4-naphthoquinone (1,4-NQ) (DMSO-*d*<sub>6</sub>).

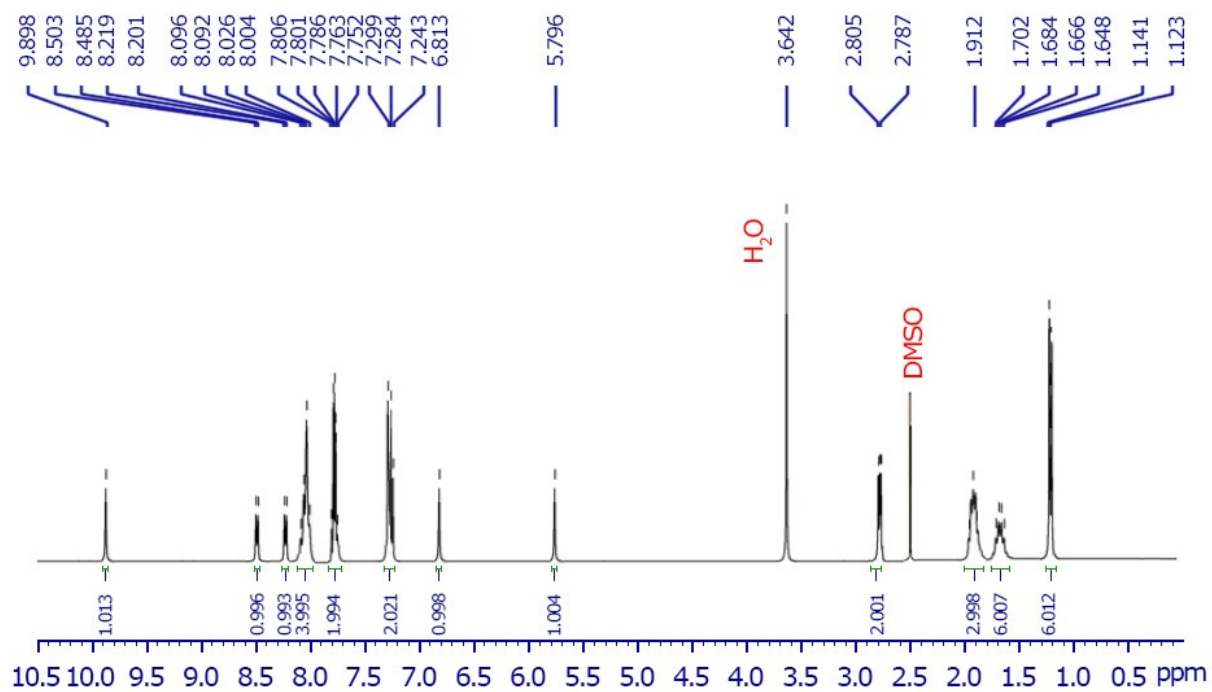

**Figure S6.** <sup>1</sup>H NMR spectrum of complex **1**, cis-Pt(1,4-NQ)(1-ADpcyd)(H<sub>2</sub>O) (DMSO-*d*<sub>6</sub>).



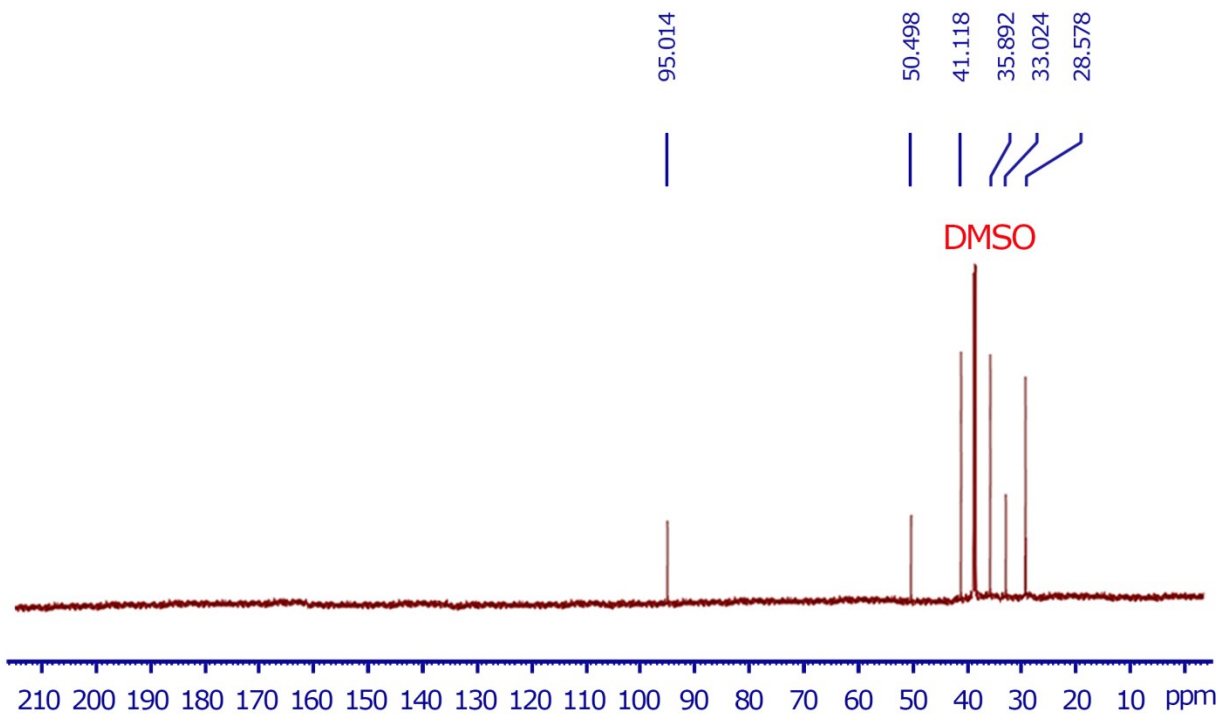

**Figure S7.**  $^{13}\text{C}$  NMR spectrum of ligand 1-Adamantanemethylecyanamide (1-ADpcydH) ( $\text{DMSO-}d_6$ ).

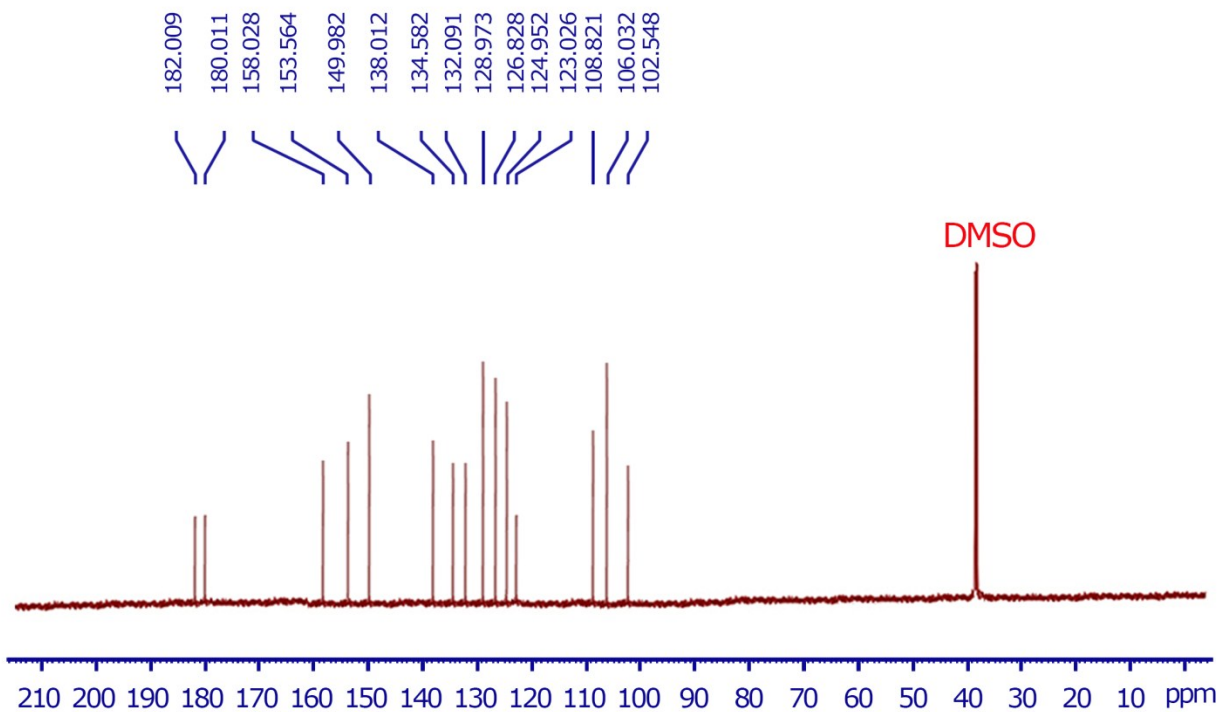

**Figure S8.**  $^{13}\text{C}$  NMR spectrum of ligand 2-[amino(2-phenylpyridine)]-1,4-naphthoquinone (1,4-NQ) ( $\text{DMSO-}d_6$ ).

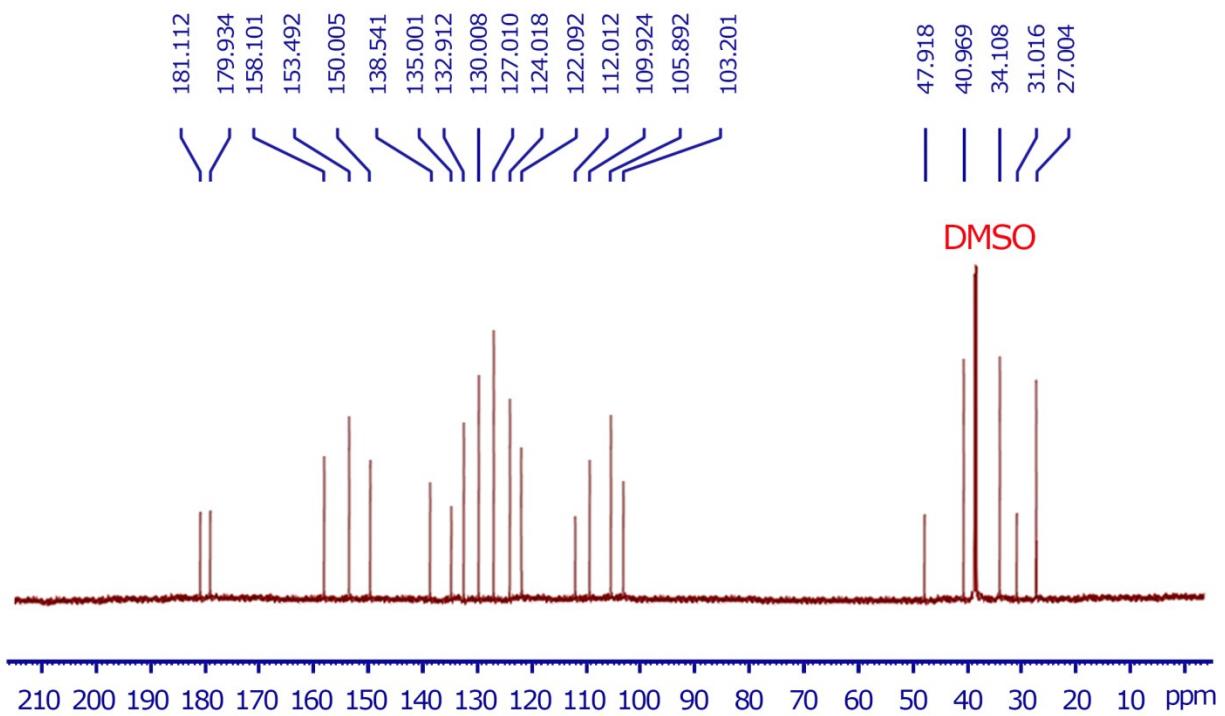

**Figure S9.**  $^{13}\text{C}$  NMR spectrum of complex **1**,  $\text{cis-Pt}(1,4\text{-NQ})(1\text{-ADpcyd})(\text{H}_2\text{O})$  ( $\text{DMSO-}d_6$ ).

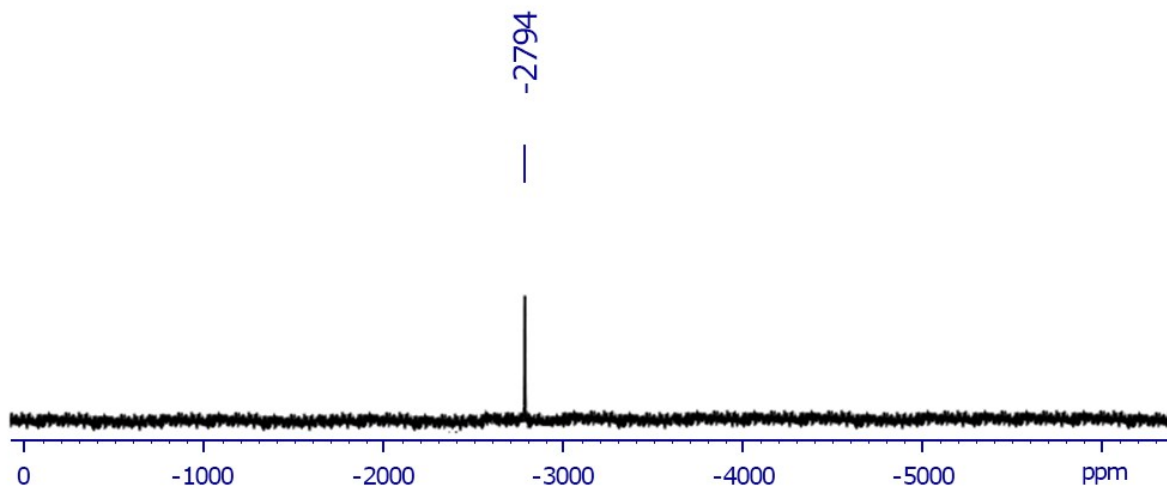

**Figure S10.**  $^{195}\text{Pt}$  NMR spectrum of complex **1**,  $\text{cis-Pt}(1,4\text{-NQ})(1\text{-ADpcyd})(\text{H}_2\text{O})$  ( $\text{DMF-}d_7$ ).

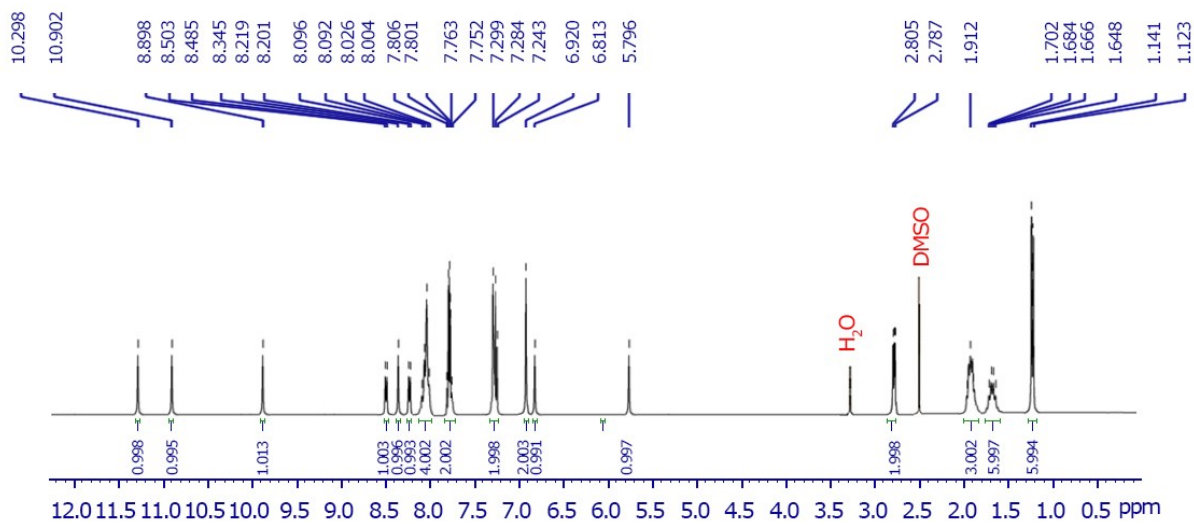

**Figure S11.**  $^1\text{H}$  NMR spectrum of complex **2**,  $\text{cis-Pt}(1,4\text{-NQ})(1\text{-ADpcyd})(\text{G})$  ( $\text{DMSO-}d_6$ ).

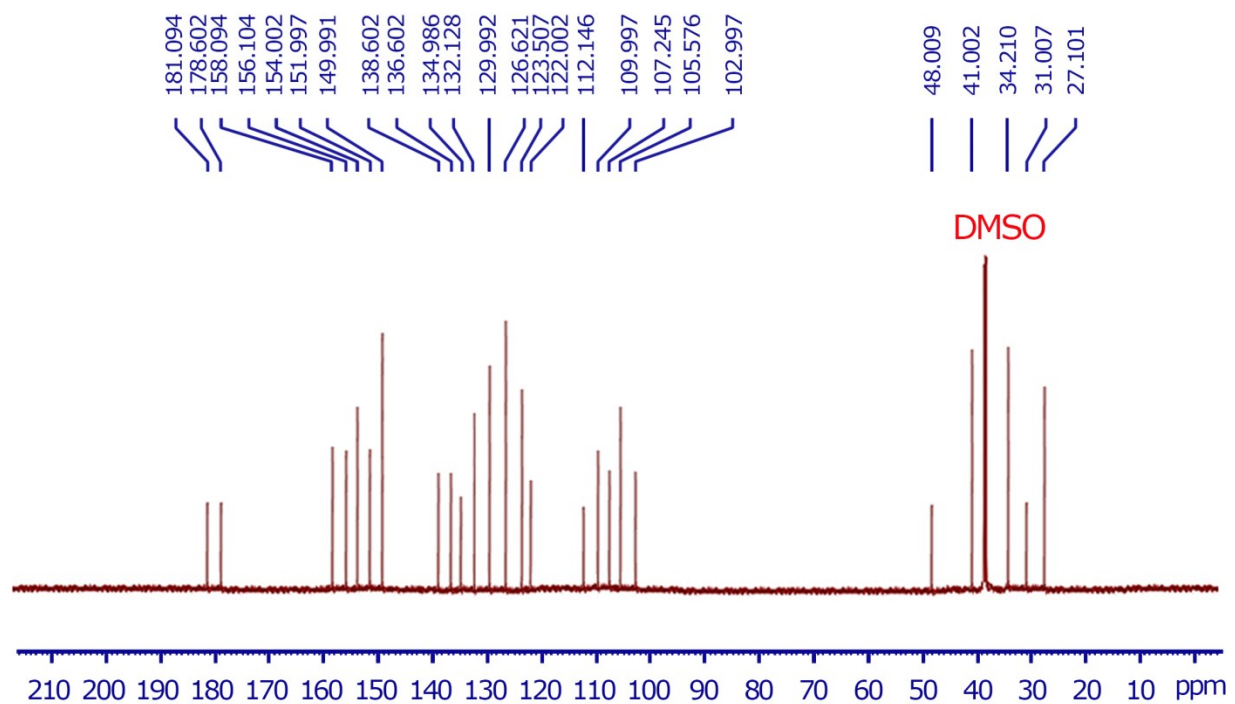

**Figure S12.**  $^{13}\text{C}$  NMR spectrum of complex **2**, cis-Pt(1,4-NQ)(1-ADpcyd)(G) (DMSO- $d_6$ ).

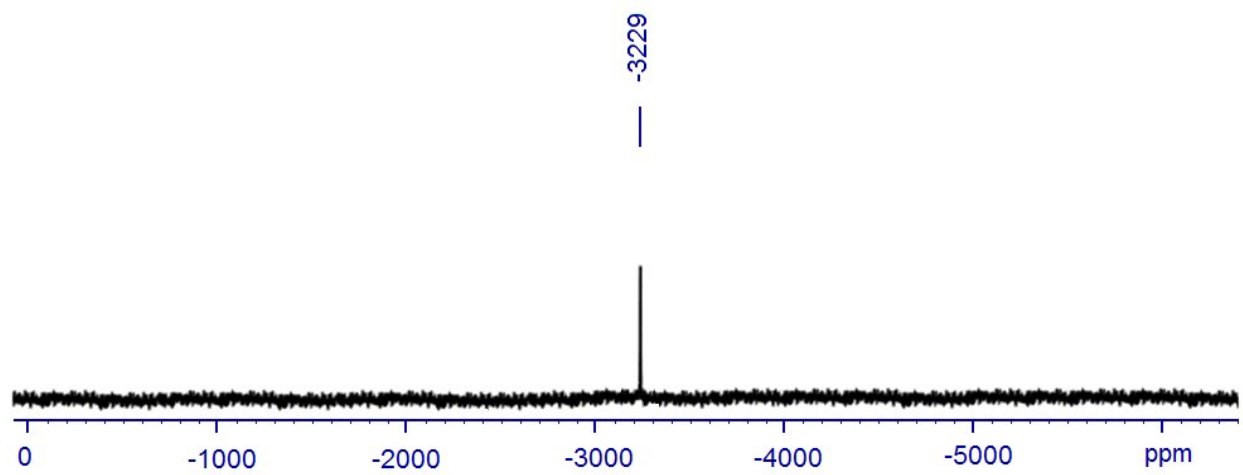

**Figure S13.**  $^{195}\text{Pt}$  NMR spectrum of complex **2**,  $\text{cis-Pt}(1,4\text{-NQ})(1\text{-ADpcyd})(\text{G})$  ( $\text{DMF-}d_7$ ).

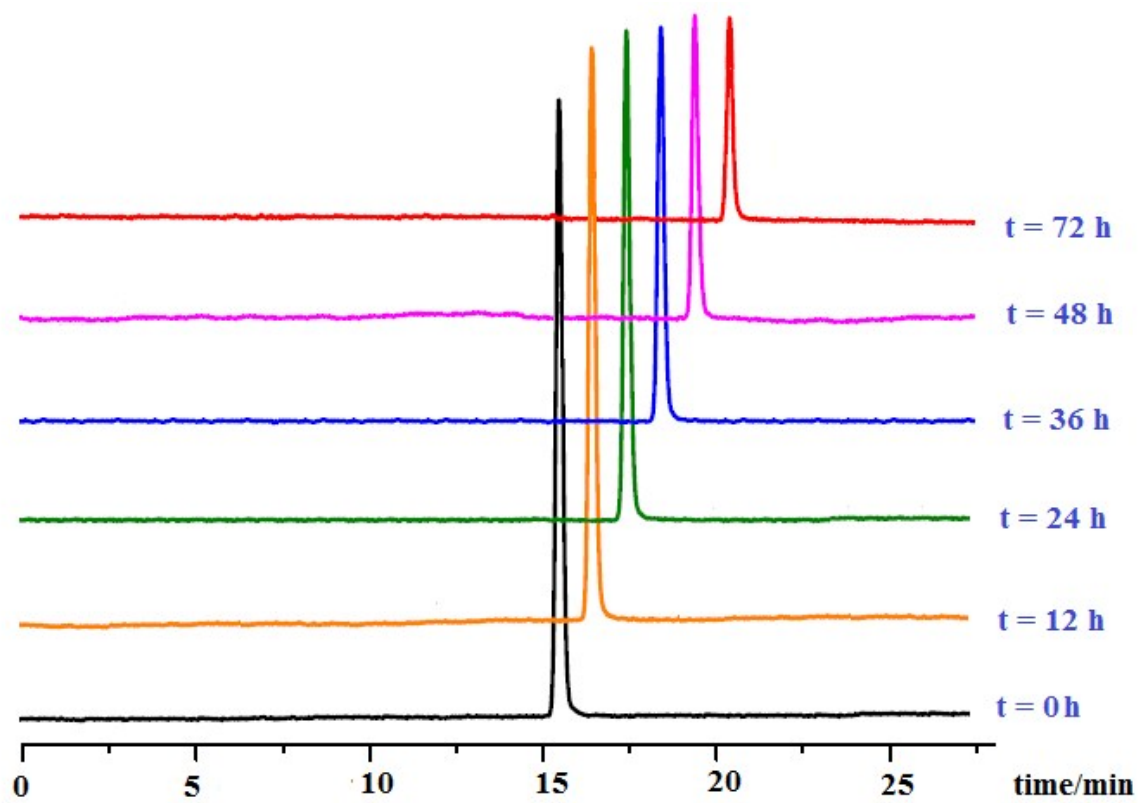

**Figure S14.** HPLC of the complex **1** in freshly prepared PBS buffer/0.5% DMSO solution recorded during 72 h of incubation time at 37 °C.



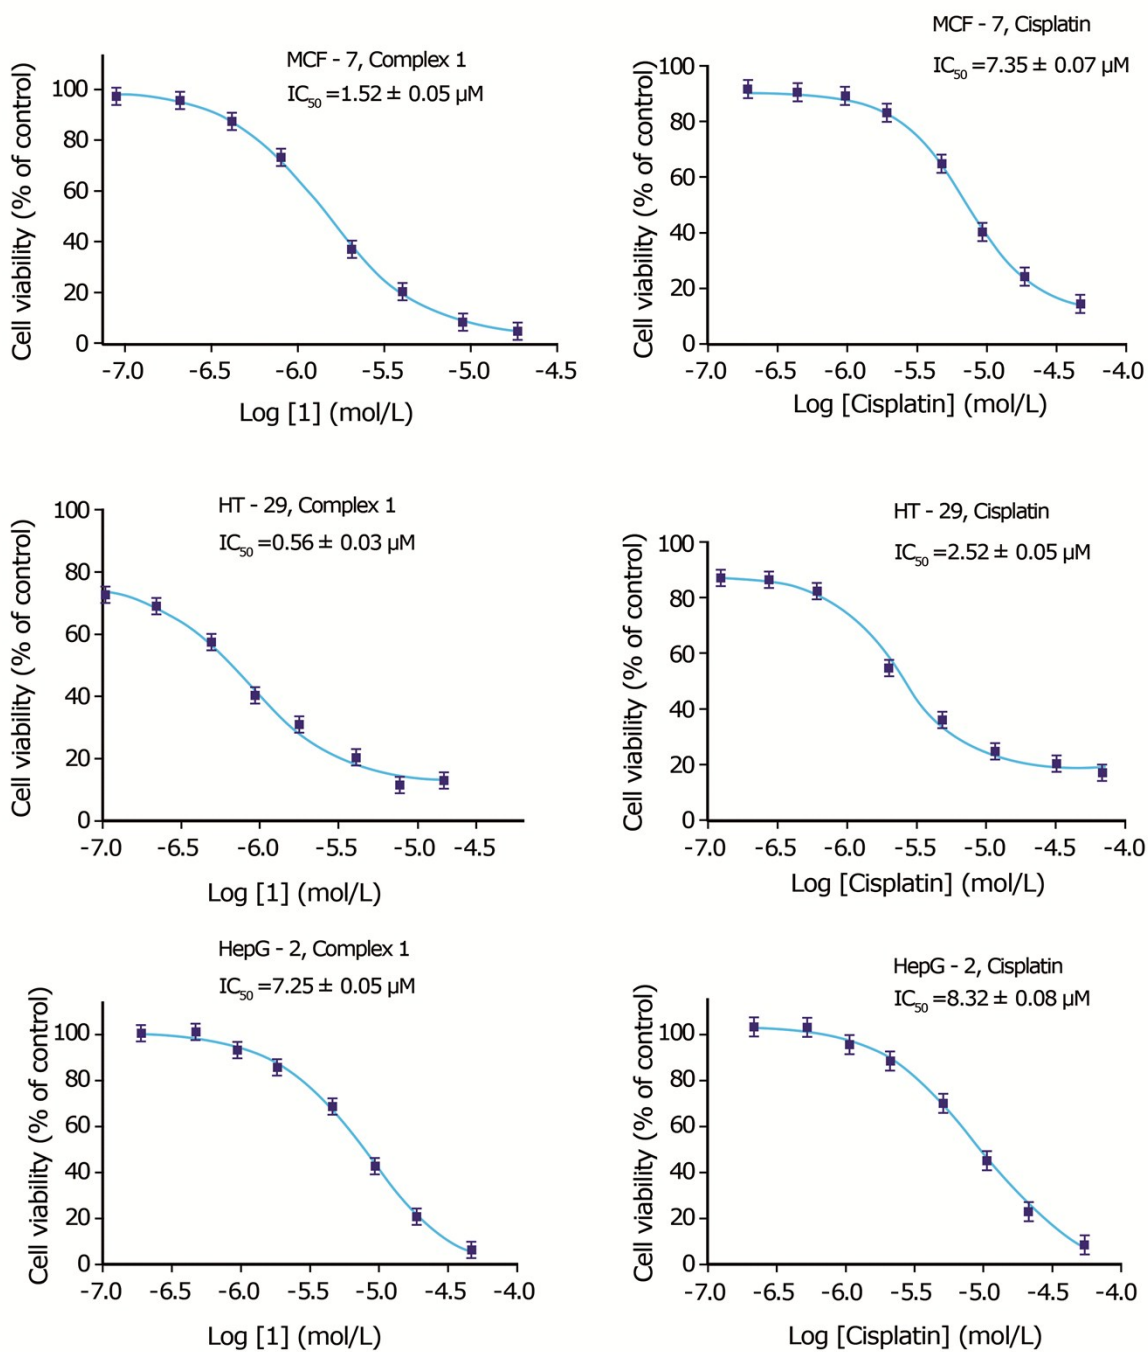

**Figure S15.** Graphs used for  $IC_{50}$  value determinations. Dose-response data points represent the mean value of 3 trials. GraphPad Prism 6 software was used to fit the data.
